# Supplementary material
Source: publisher figshare collection journal article supplement (https://acs.figshare.com/ndownloader/files/26568796)
Supplement: Supplementary file [file 26568796]

## **Supporting Information**

### **Mimicking H3 substrate arginine in the design of G9a lysine methyltransferase inhibitors for cancer therapy: a computational study for structure-based drug design**

M. Ramya Chandar Charles,<sup>1</sup> Mu-Chun Li,<sup>2,3</sup> Hsing-Pang Hsieh,<sup>2,3,4\*</sup> Mohane Selvaraj Coumar.<sup>1\*</sup>

<sup>1</sup>Centre for Bioinformatics, School of Life Sciences, Pondicherry University, Kalapet, Puducherry, 605014, India.

<sup>2</sup>Institute of Biotechnology and Pharmaceutical Research, National Health Research Institutes, 35 Keyan Road, Zhunan, Miaoli County 350, Taiwan, ROC.

<sup>3</sup>Department of Chemistry, National Tsing Hua University, No. 101, Section 2, Kuang-Fu Road, Hsinchu 300, Taiwan.

<sup>4</sup>Biomedical Translation Research Center, Academia Sinica, Taipei 115, Taiwan.

\*Corresponding authors' e-mails: [hphsieh@nhri.edu.tw](mailto:hphsieh@nhri.edu.tw) & [mohane@bicpu.edu.in](mailto:mohane@bicpu.edu.in)

**Table S1.** Molecular orbitals energy gap of known G9a inhibitors and newly designed guanidine analogs.

| Compound                      | Molecular Orbitals |                   |          |                  |
|-------------------------------|--------------------|-------------------|----------|------------------|
|                               | E <sub>HOMO</sub>  | E <sub>LUMO</sub> | ΔE (eV)  | Electron density |
| BIX-01294                     | -0.174774          | -0.029814         | 0.14496  | 551.126          |
| BIX-01294<br>guanidine analog | -0.292966          | -0.154000         | 0.138966 | 477.758          |
| UNC0638                       | -0.497871          | -0.349871         | 0.148000 | 594.143          |
| UNC0638<br>guanidine analog   | -0.330336          | -0.189805         | 0.140531 | 550.799          |

**Table S2.** *In silico* ADME profile of the compounds included in the study.

| Molecule                      | Lipinski rule (violations) | Lipophilicity (iLOGP) | Solubility (SILICOS-IT class) | BBB permeant | PAINS alerts |
|-------------------------------|----------------------------|-----------------------|-------------------------------|--------------|--------------|
| BIX-01294                     | 0                          | 4.67                  | Poorly soluble                | Yes          | 0            |
| BIX-01294<br>guanidine analog | 0                          | 3.42                  | Poorly soluble                | No           | 0            |
| UNC0638                       | 1                          | 5.67                  | Poorly soluble                | Yes          | 0            |
| UNC0638<br>guanidine analog   | 0                          | 4.3                   | Moderately soluble            | No           | 0            |

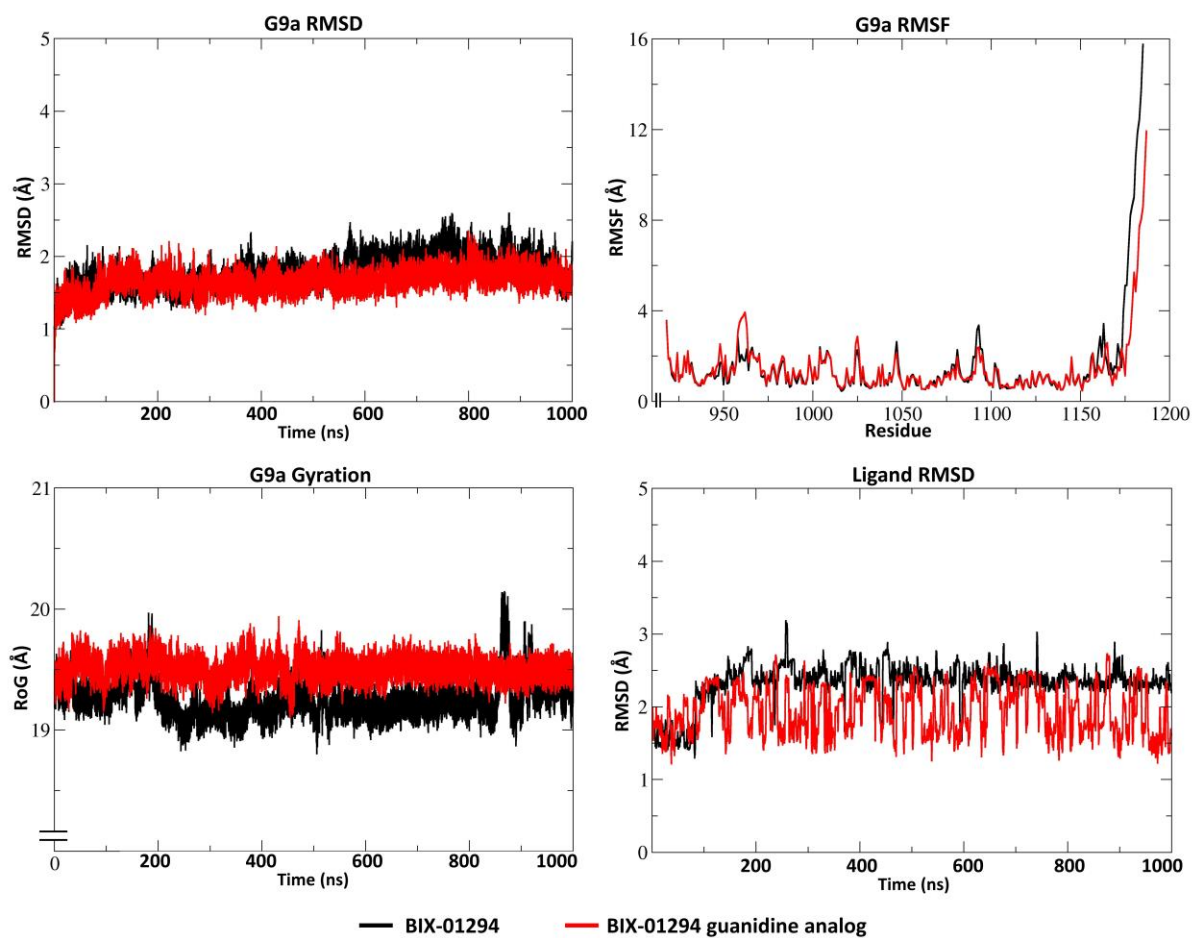

**Figure S1.** Root mean square deviation (RMSD), root mean square fluctuation (RMSF), radius of gyration and ligand RMSD plots of BIX-01294 and its guanidine analog from 1  $\mu$ s MD simulation.

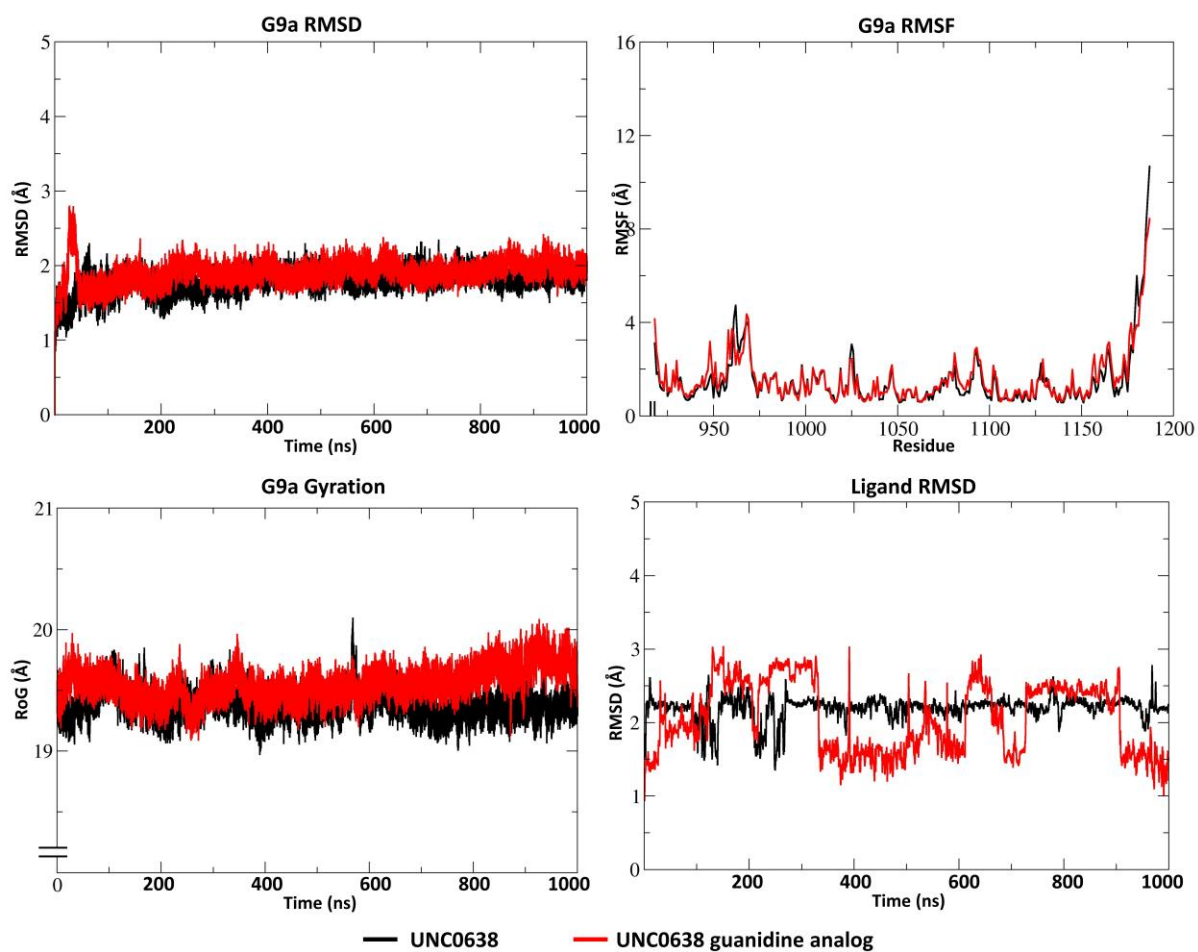

**Figure S2.** Root mean square deviation (RMSD), root mean square fluctuation (RMSF), radius of gyration and ligand RMSD plots of the UNC0638 and its guanidine analog from 1  $\mu$ s MD simulation.

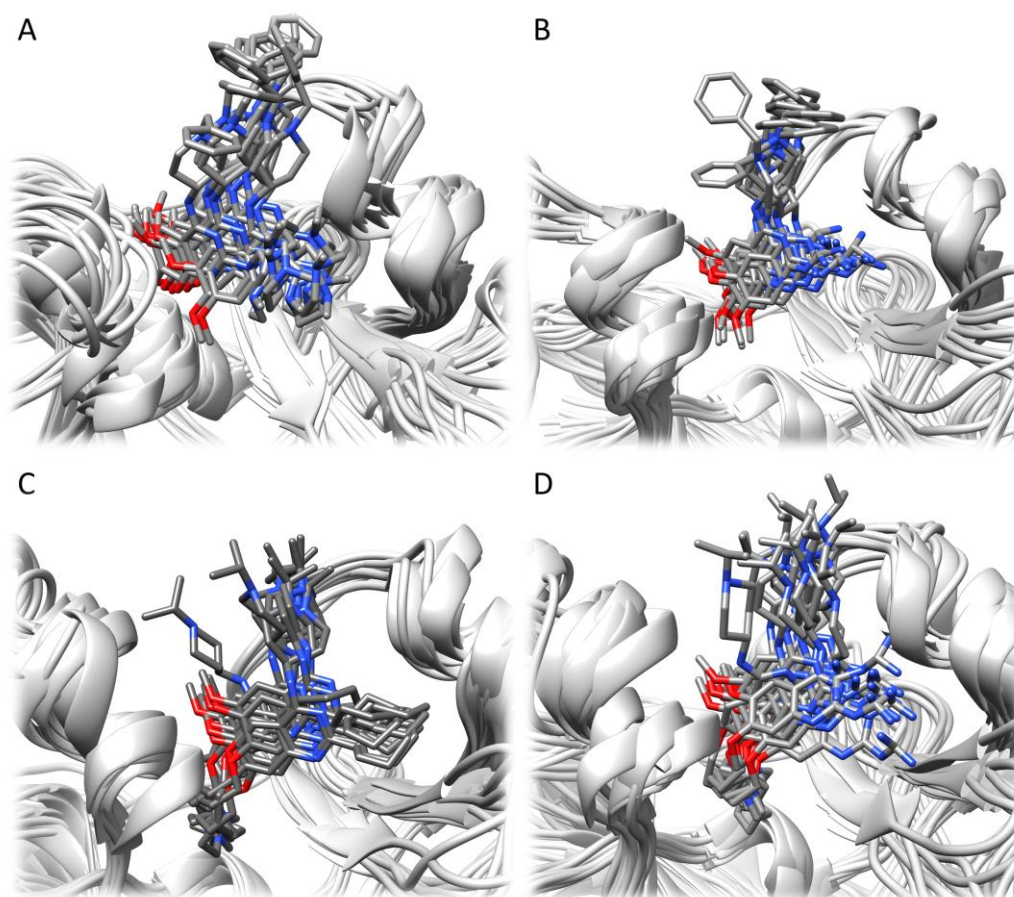

**Figure S3.** Superimposition of G9a - inhibitor complex structures extracted from molecular dynamics simulations. Frames were extracted at 100 ns intervals from the 1  $\mu$ s MD trajectory. (A) BIX-01294, (B) BIX-01294 guanidine analog, (C) UNC0638 and (D) UNC0638 guanidine analog.

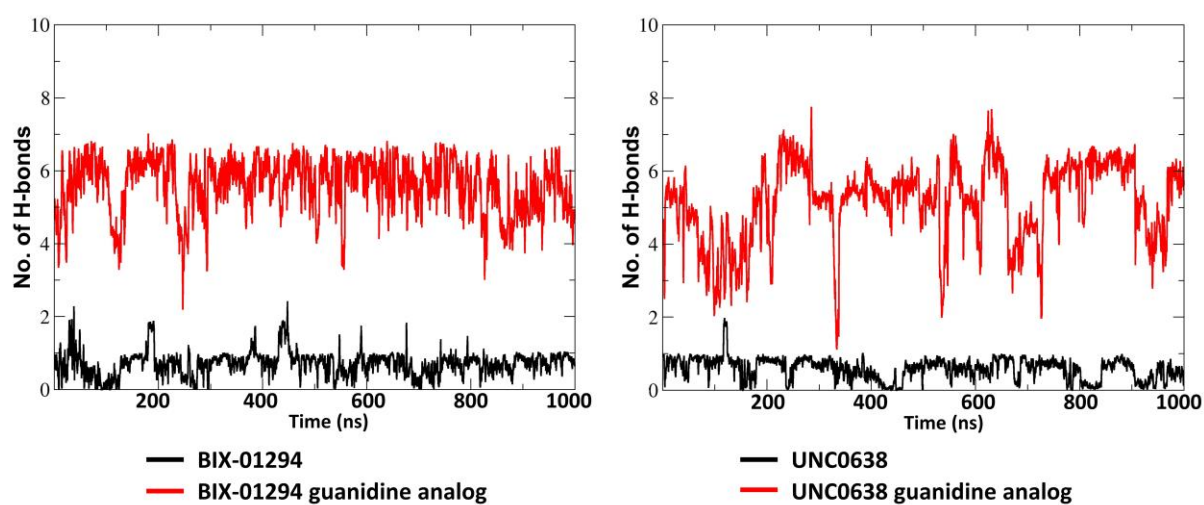

**Figure S4.** Number of H-bonds (shown as running average plots) observed during molecular dynamics simulation of G9a - inhibitor complexes.

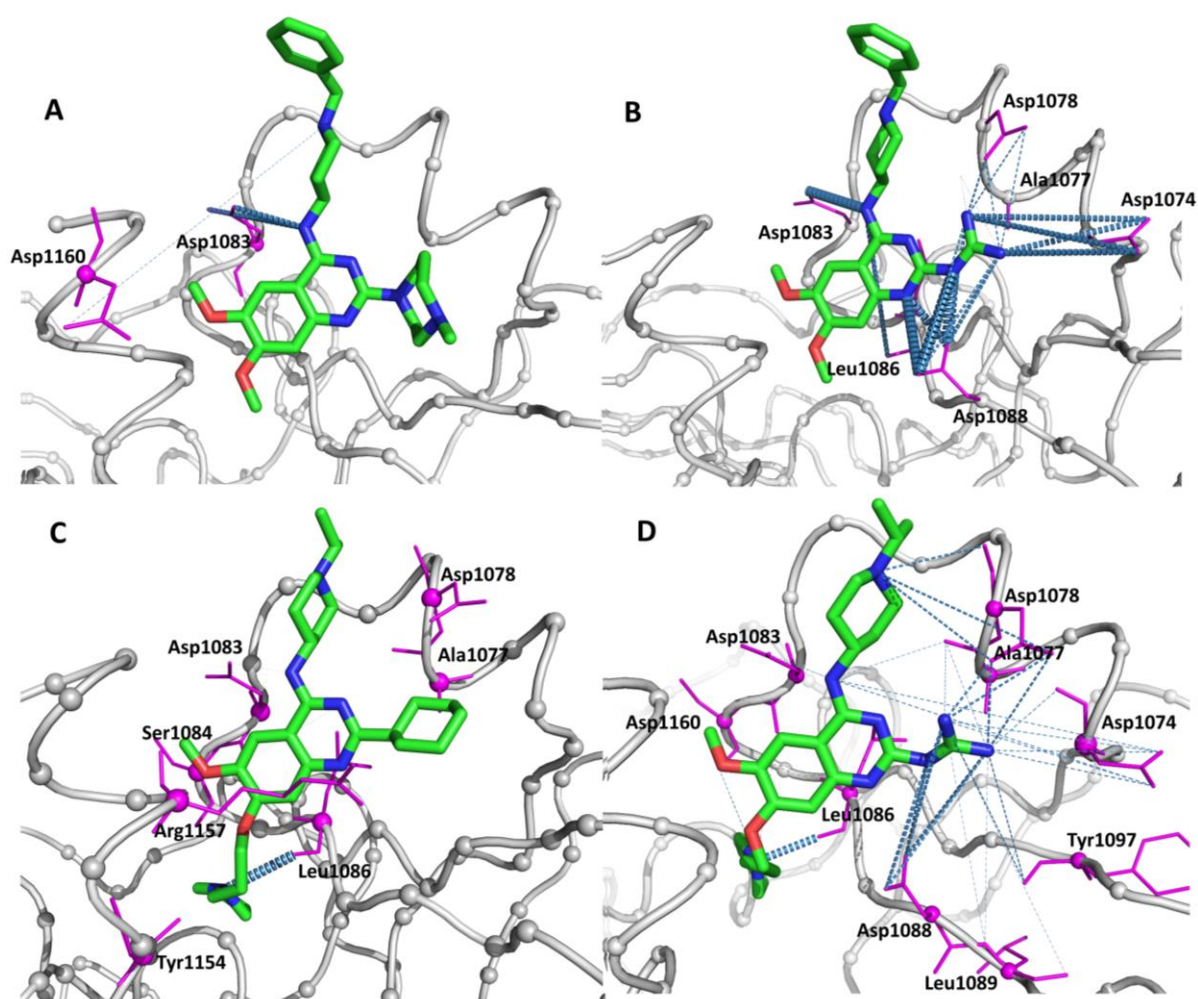

**Figure S5.** 3D representation of hydrogen bonds (blue dotted line) formed between (A) G9a and BIX-01294, (B) G9a and BIX-01294 guanidine analog, (C) G9a and UNC0638, and (D) G9a and UNC0638 guanidine analog during MD simulation of the G9a - inhibitor complexes. Thickness of the blue dotted lines represents the number of frames during which the particular H-bonds appeared in the MD trajectory. Only H-bonds observed in more than thousand frames of the simulations are shown. H-bond forming residues are shown in magenta solid lines.



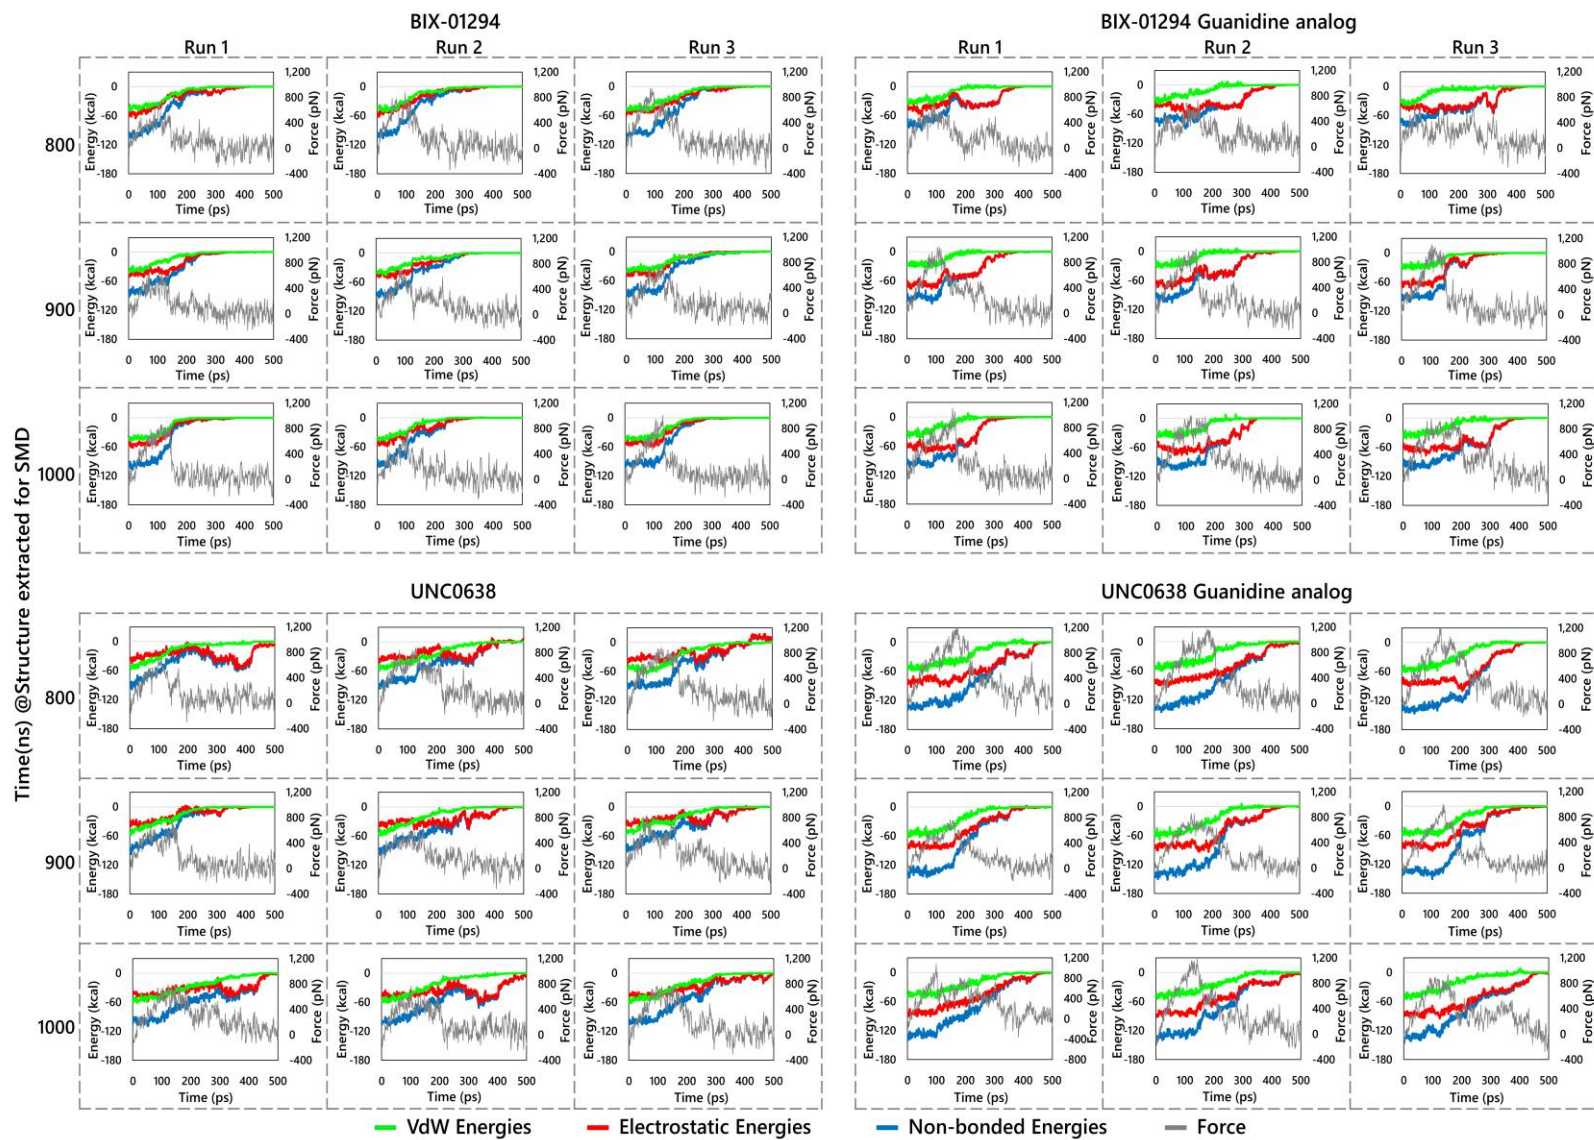

**Figure S6.** Steered molecular dynamics results of G9a inhibitors and their guanidine analogs.

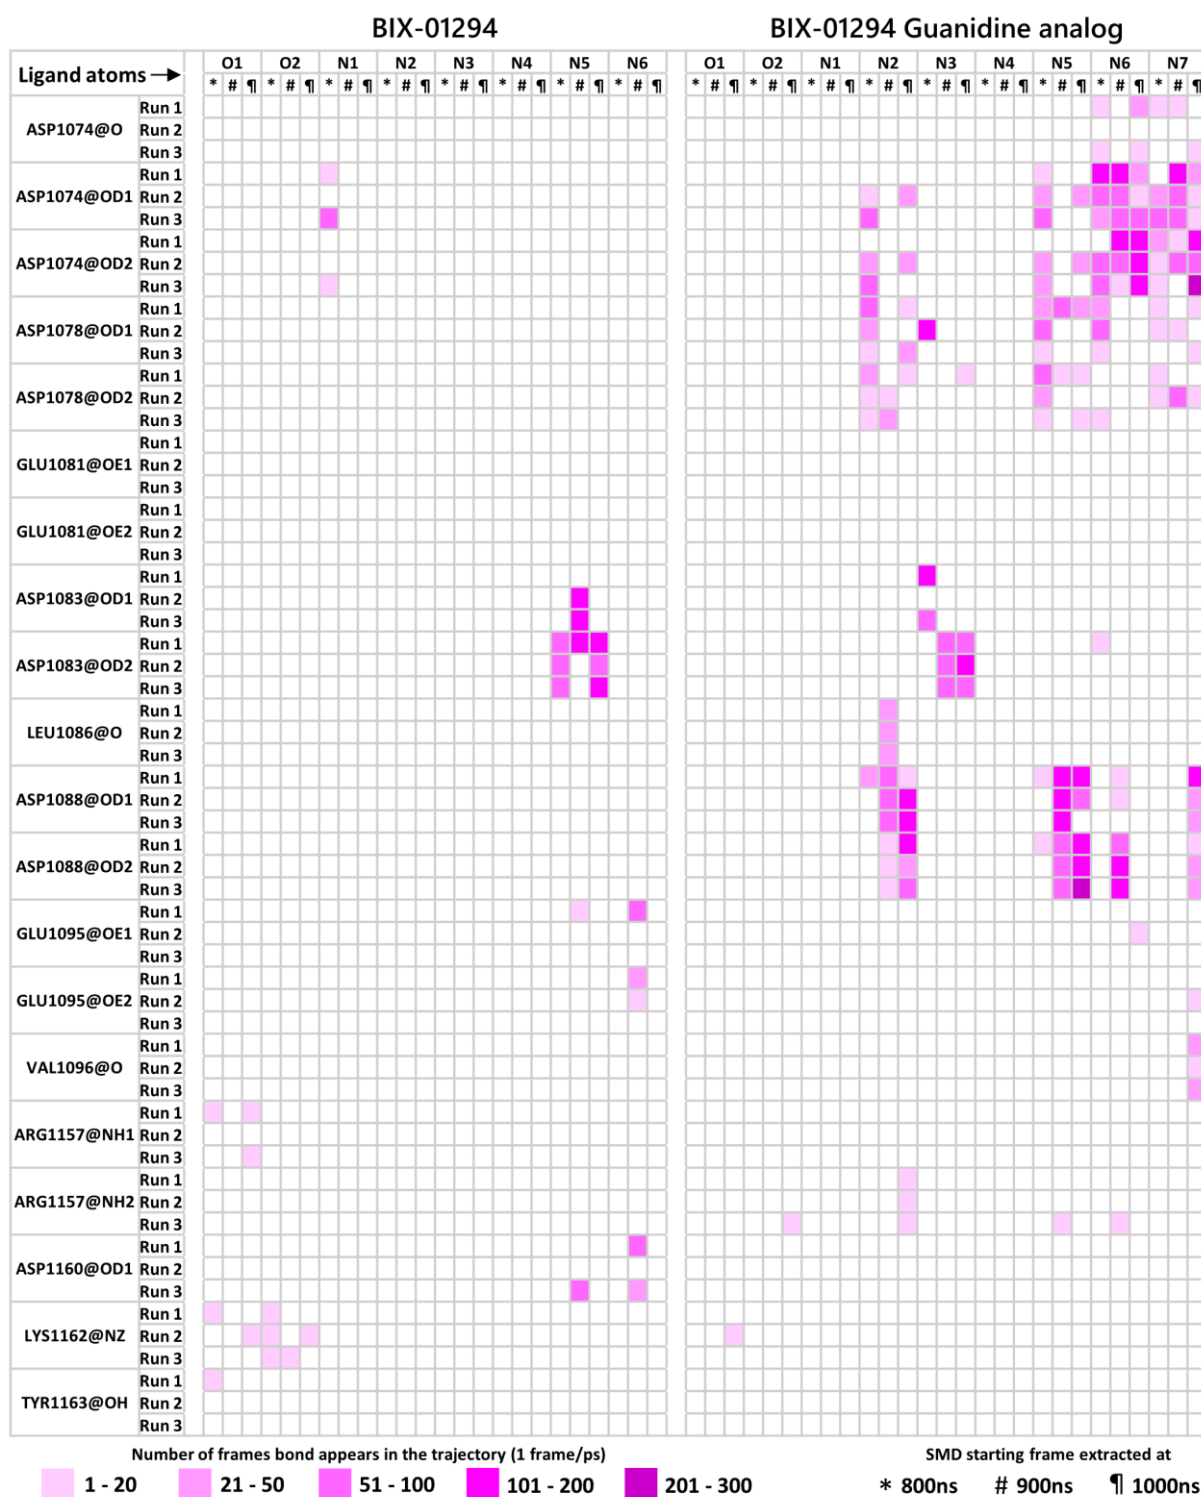

**Figure S7.** Frequency of H-bonds formed during dissociation of BIX-01294 and BIX-01294 guanidine analog from G9a in SMD experiments.



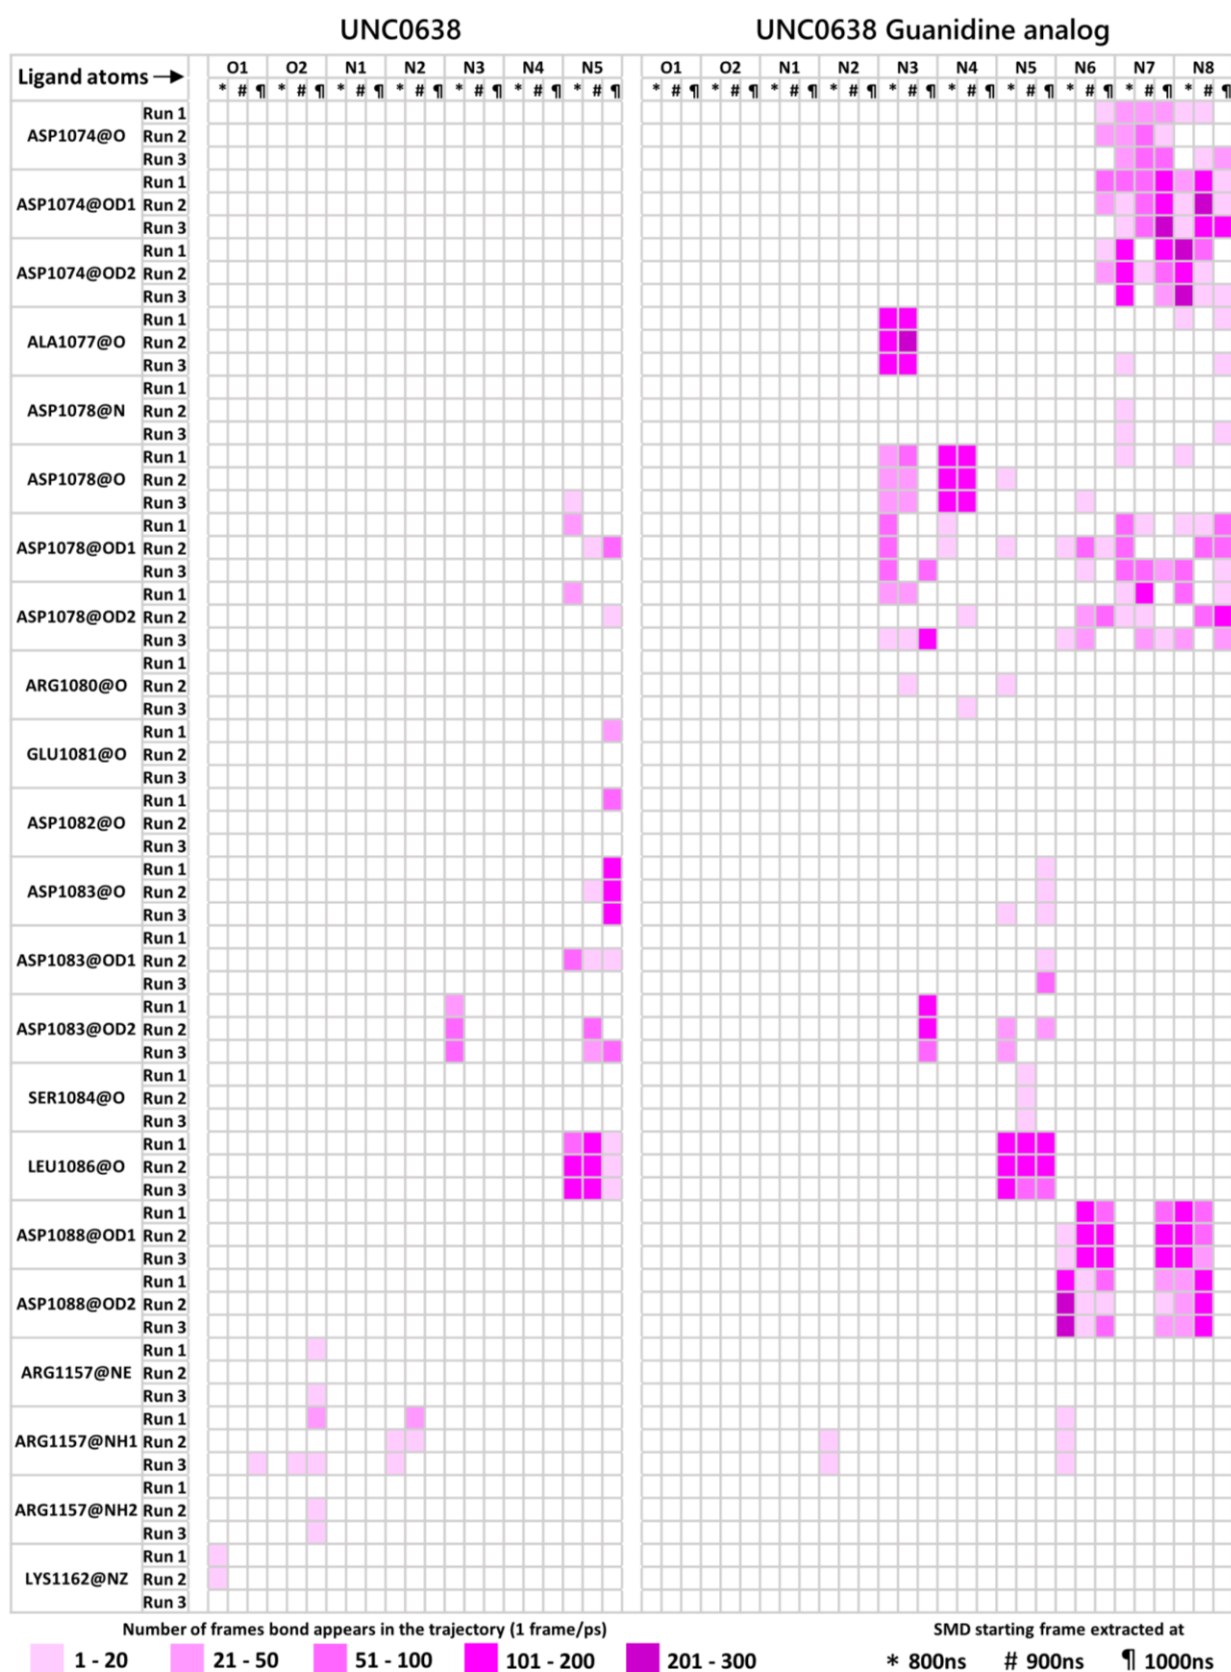

**Figure S8.** Frequency of H-bonds formed during dissociation of UNC0638 and UNC0638 guanidine analog from G9a in SMD experiments.

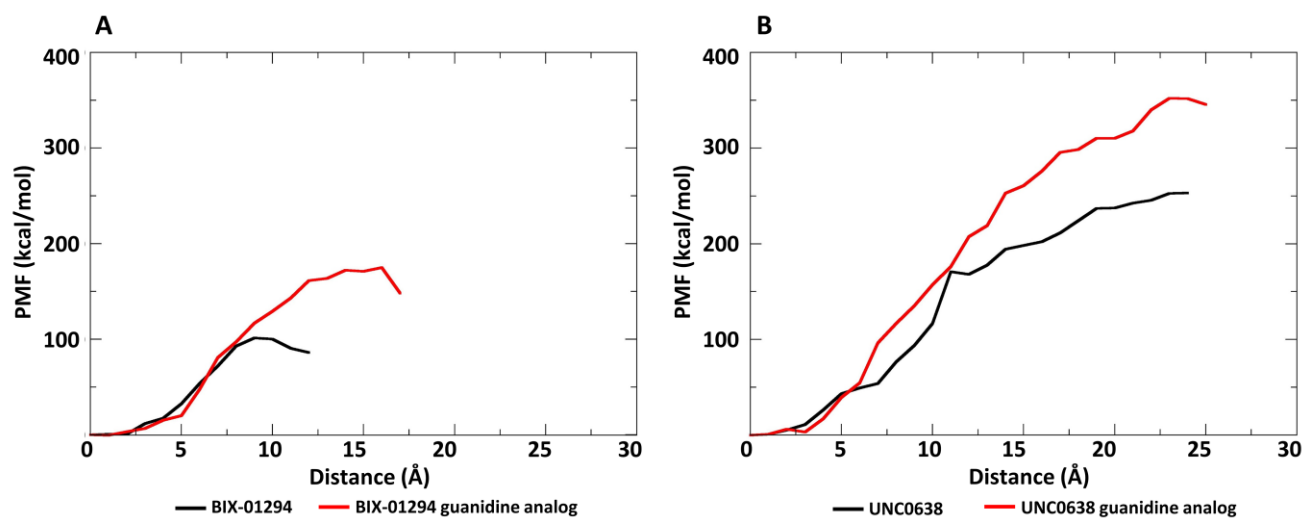

**Figure S9.** Potential of mean force (PMF) profiles of ligand dissociation for (A) BIX-01294 and BIX-01294 guanidine analog and (B) UNC0638 and UNC0638 guanidine analog.

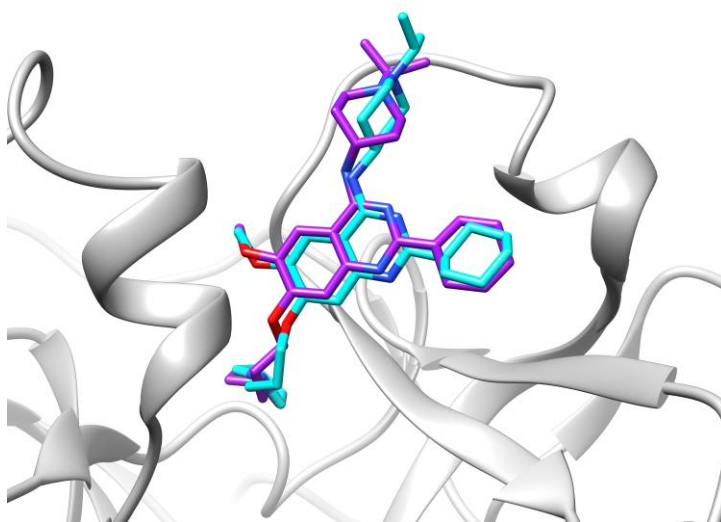

**Figure S10.** Superimposition of crystal structure (cyan) orientation and docked orientation (magenta) of UNC0638 in G9a protein (PDB ID: 3RJW). RMS deviation of 0.145 Å.
